# Supplementary material
Source: PubMed Central journal article supplement (PMC4199119)
Supplement: supp_141.17.3340_DEV109835.pdf [file supp_141.17.3340_DEV109835.pdf]

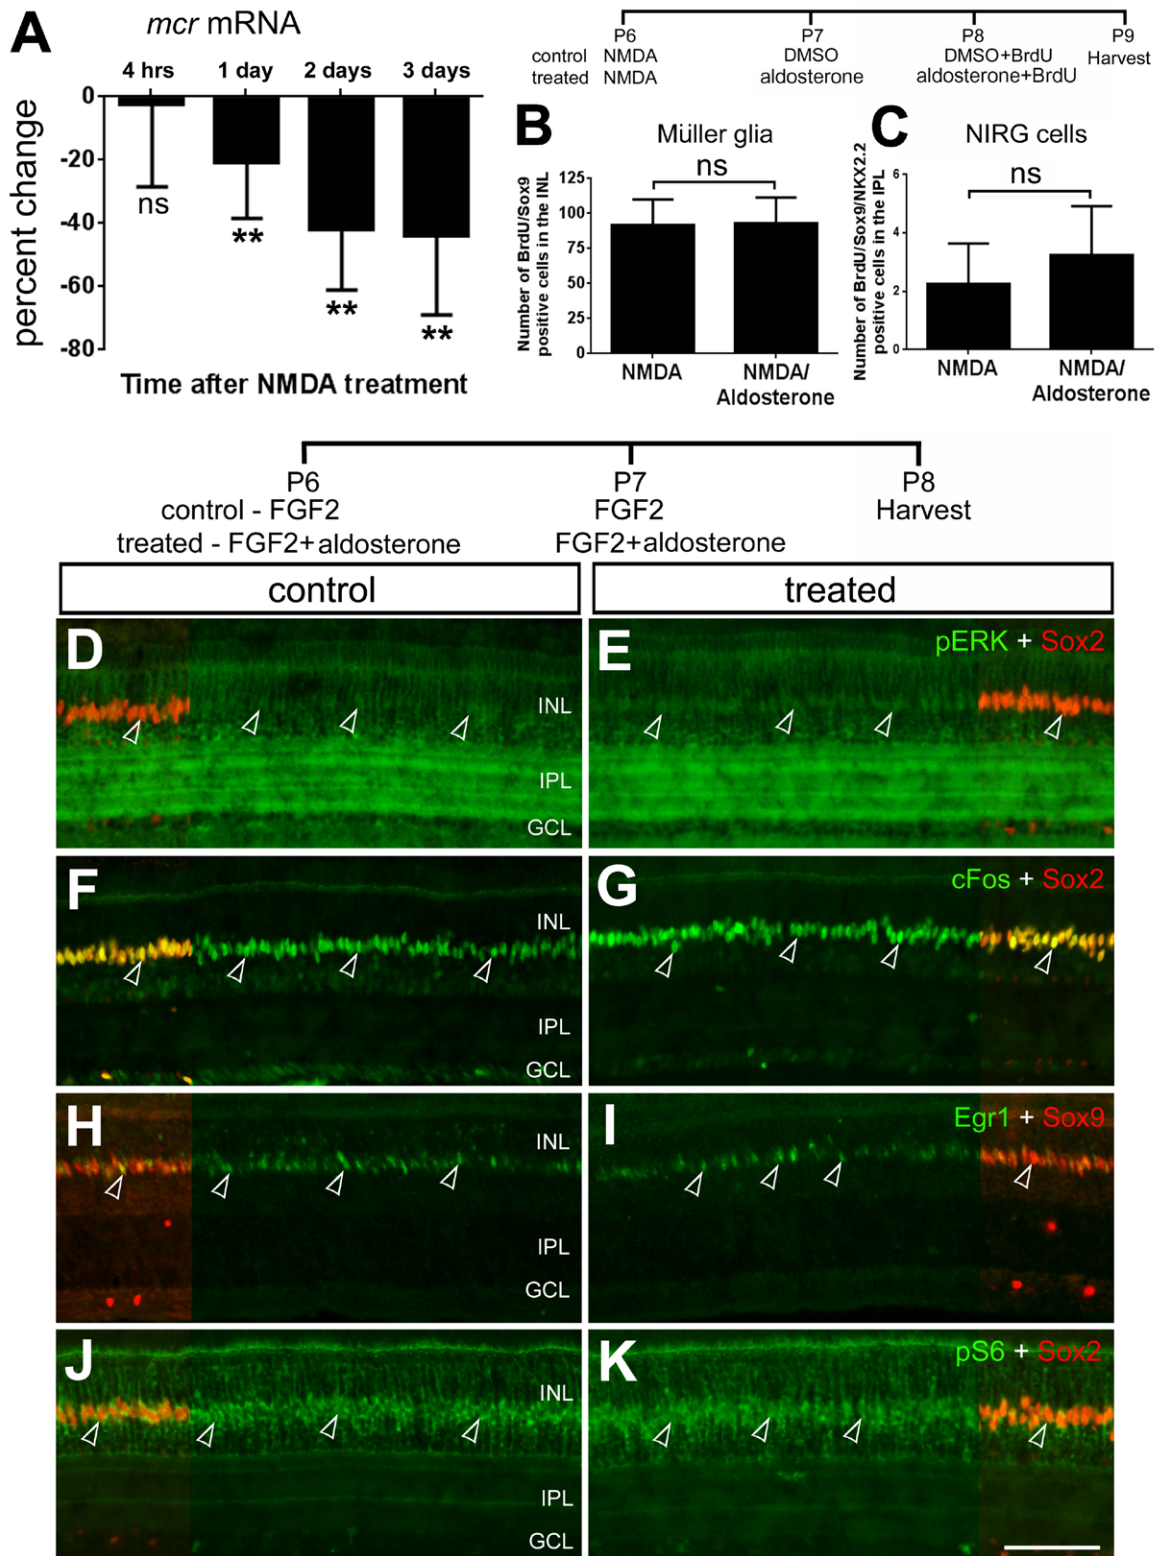

**Supplemental Figure S1.** Levels of *mcr* are decreased after NMDA-treatment, the MCR-agonist aldosterone has little effect upon the proliferation of MGPCs, and aldosterone does not influence FGF2/MAPK-signaling. **A**; qRT-PCR was used to measure levels of mRNA for *mcr* at 4 hrs, 1 day, 2 days and 3 days after NMDA-treatment. The histogram illustrates the mean ( $\pm$ SD; n=4) percentage change of mRNA. Significance of difference between control and treated groups was determined by using a two-tailed Mann-Whitney U test (\*\*p<0.01, ns-not significant). **B** and **C**; histograms illustrate the mean ( $\pm$ SD; n=8) number of proliferating MGPCs or NIRG cells per field of view in retinas treated with NMDA + vehicle (control) or NMDA + aldosterone (treated). Significance of difference (ns - not significant) for treated vs control data sets was determined by using a two-tailed, paired t-test. **D-K**; Retinas were obtained from eyes that were injected 2 consecutive days with FGF2  $\pm$  aldosterone, and harvested 24 hrs after the last injection. Retinal sections were labeled with antibodies to pERK1/2 (**D** and **E**; green), cFos (**F** and **G**; green), Egr1 (**H** and **I**; green), pS6 (**J** and **K**; green), Sox2 (**D-G**, **J**, **K**; red) or Sox9 (**H** and **I**; red). Hollow arrowheads indicate the nuclei of Müller glia. The 50  $\mu$ m bar in **K** applies to **D-K**.

**Supplementary Table S1. PCR Primer sequences and predicted product sizes**

| <b>Gene</b>                    | <b>Forward primer 5'-3'</b> | <b>Reverse primer 5'-3'</b> | <b>Product size (bp)</b> |
|--------------------------------|-----------------------------|-----------------------------|--------------------------|
| <i>gcr</i>                     | AAC CTG CTC TGG CTG ACT TC  | GCC TGA AGT CCG TTT CTC CA  | 186                      |
| <i>hsd1</i>                    | GGT GCA GAT GGT CTC ACA CA  | CAG AAA CTC GGG AGC AAG GT  | 163                      |
| <i>hsd2</i>                    | AAA GTC AGC CTC ATC CTG CC  | TGA ACT GCC GGT TGA TCT CC  | 154                      |
| <i>mcr</i>                     | TCA AAA CCA GAC ACA GCC GA  | GGT CCT CGA GAG GCA AGT TT  | 124                      |
| <i>il6</i>                     | TTA GTT CGG GCA CAA TCC TC  | GGT TCC TGA AAC GGA ACA AC  | 72                       |
| <i>il6R<math>\alpha</math></i> | AAA GAT GTG CTC TGC GAG TG  | AAC CTG CGC TTC ATC CAT AG  | 80                       |
| <i>il1<math>\beta</math></i>   | GCA TCA AGG GCT ACA AGC TC  | CAG GCG GTA GAA GAT GAA GC  | 131                      |
| <i>tnfa</i>                    | AGC AGC GTT TGG GAG TGG GC  | GCA GAT GGG GCA GGA AAG CCA | 133                      |
| <i>adam17</i>                  | AGC GAG TGC CCT CCT CCT GG  | TTG CAG GCA CAC GAG CGG AG  | 125                      |
| <i>cNotch1</i>                 | GGC TGG TTA TCA TGG AGT TA  | CAT CCA CAT TGA TCT CAC AG  | 154                      |
| <i>cDelta1</i>                 | CAC TGA CAA CCC TGA TGG TG  | TGG CAC TGG CAT ATG TAG GA  | 152                      |
| <i>cDll4</i>                   | GGT CTG CAG CGA GAA CTA CT  | TGC AGT ATC CAT TCT GTT CG  | 181                      |
| <i>cJag1</i>                   | TGA TAA GTG CAT TCC ACA CC  | CAG GTA CCA CCA TTC AAA CA  | 149                      |
| <i>cHes1</i>                   | CGC TGA AGA AGG ATA GTT CG  | GTC ACT TCG TTC ATG CAC TC  | 175                      |
| <i>cHes5</i>                   | GGA GAA GGA GTT CCA GAG AC  | AAT TGC AGA GCT TCT TTG AG  | 143                      |
| <i>ascl1a</i>                  | AGG GAA CCA CGT TTA TGC AG  | TTA TAC AGG GCC TGG TGA GC  | 187                      |
| <i>c3</i>                      | TCC CCC ATG AGG AAT GGG AT  | ATA GTC CAT GTC CCC AGG CT  | 74                       |
| <i>c3aR</i>                    | CACT CGC ATA TGC CAA CAG C  | GCC TTT GCT CTG AAG TCC CT  | 73                       |
| <i>gapdh</i>                   | CAT CCA AGG AGT GAG CCA AG  | TGG AGG AAG AAA TTG GAG GA  | 161                      |

**Supplementary Table S2. Antibodies, sources and working dilutions.**

| Antigen                     | Working dilution | Host   | Clone or catalog number | Source                                                          |
|-----------------------------|------------------|--------|-------------------------|-----------------------------------------------------------------|
| <b>Primary antibodies</b>   |                  |        |                         |                                                                 |
| GCR                         | 1:400            | rabbit | PA1-511A                | Thermo Scientific                                               |
| GCR                         | 1:500            | rabbit | H-300 sc-8992           | Santa Cruz Immunochemicals                                      |
| Sox2                        | 1:1000           | goat   | Y-17                    | Santa Cruz Immunochemicals                                      |
| Sox9                        | 1:2500           | rabbit | AB5535                  | Millipore<br>Billerica, MA                                      |
| Nkx2.2                      | 1:80             | mouse  | 74.5A5                  | Developmental Studies Hybridoma<br>Bank (DSHB)<br>Iowa City, IA |
| Top <sub>AP</sub>           | 1:100            | mouse  | 2M6                     | Dr. P. Linser<br>University of Florida                          |
| BrdU                        | 1:200            | rat    | OBT00030S               | AbD Serotec<br>Raleigh, NC                                      |
| Egr1                        | 1:1000           | goat   | AF2818                  | R&D Systems                                                     |
| pERK1/2                     | 1:200            | rabbit | 137F5                   | Cell Signaling Technologies                                     |
| cFos                        | 1:400            | rabbit | K-25                    | Santa Cruz Immunochemicals                                      |
| pS6                         | 1:400            | rabbit | 2215                    | Cell Signaling Technologies                                     |
| neurofilament               | 1:50             | mouse  | RT97                    | DSHB                                                            |
| CD45                        | 1:200            | mouse  | HIS-C7                  | Cedi Diagnostic                                                 |
| p38 MAPK                    | 1:400            | rabbit | 12F8                    | Cell Signaling Technologies                                     |
| pCREB                       | 1:500            | rabbit | 87G3                    | Cell Signaling Technologies                                     |
| <b>Secondary antibodies</b> |                  |        |                         |                                                                 |
| Goat IgG                    | 1:1000           | donkey | Alexa488/568            | Invitrogen                                                      |
| Rabbit IgG                  | 1:1000           | goat   | Alexa488/568/647        | Invitrogen                                                      |
| Mouse IgG                   | 1:1000           | goat   | Alexa488/568/647        | Invitrogen                                                      |
| Rat IgG                     | 1:1000           | goat   | Alexa488                | Invitrogen                                                      |
